# Supplementary material
Source: Springer Nature journal article supplement (https://www.springermedizin.de/resource/supplementary/12884_2012_659_MOESM2_ESM.pdf/9458458)
Supplement: MOESM2 [file 9458458]

## Enrollment

Assessed for eligibility (n= 468)

Excluded (n= 367)

- ◆ Not meeting inclusion criteria (n= 206)
- ◆ Declined to participate (n= 147)
- ◆ Other reasons (n= 14)

Randomized (n= 101)

## Allocation

### Outpatient Foley Catheter

Allocated to intervention (n= 50)

- Received allocated intervention (n= 39)
- Did not receive allocated intervention (n= 11)
  - SROM or 2cm dilated on insertion (n = 4)
  - Patient crossover request (n =1)
  - Catheter inserted, did not go home (n = 6): 4 concerns re CTG, 1 in labour, 1 late insertion

### Inpatient PGE2 gel

Allocated to intervention (n= 51)

- Received allocated intervention (n= 49)
- Did not receive allocated intervention (n= 2)
  - labour commenced pre-insertion (n =1)
  - Pre-PGE2 CTG concerns, Foley inserted (n=1)

## Follow-Up

Lost to follow-up (n= 0)

Discontinued intervention (n= 0)

Lost to follow-up (n= 0)

Discontinued intervention (n= 0)

## Analysis

Analysed (n= 50)

- ◆ Excluded from analysis (n= 0)

Analysed (n= 51)

- ◆ Excluded from analysis (n= 0)
